# Supplementary material for: Genome Stability of Lyme Disease Spirochetes: Comparative Genomics of Borrelia burgdorferi Plasmids
Source: PLOS journal article supplement (doi:10.1371/journal.pone.0033280), 2012-03-14
Supplement: S1 (10.1371/journal.pone.0033280.s001) [file journal.pone.0033280.s001]

Figure S1. The Right End of the *B. burgdorferi* JD1 Chromosome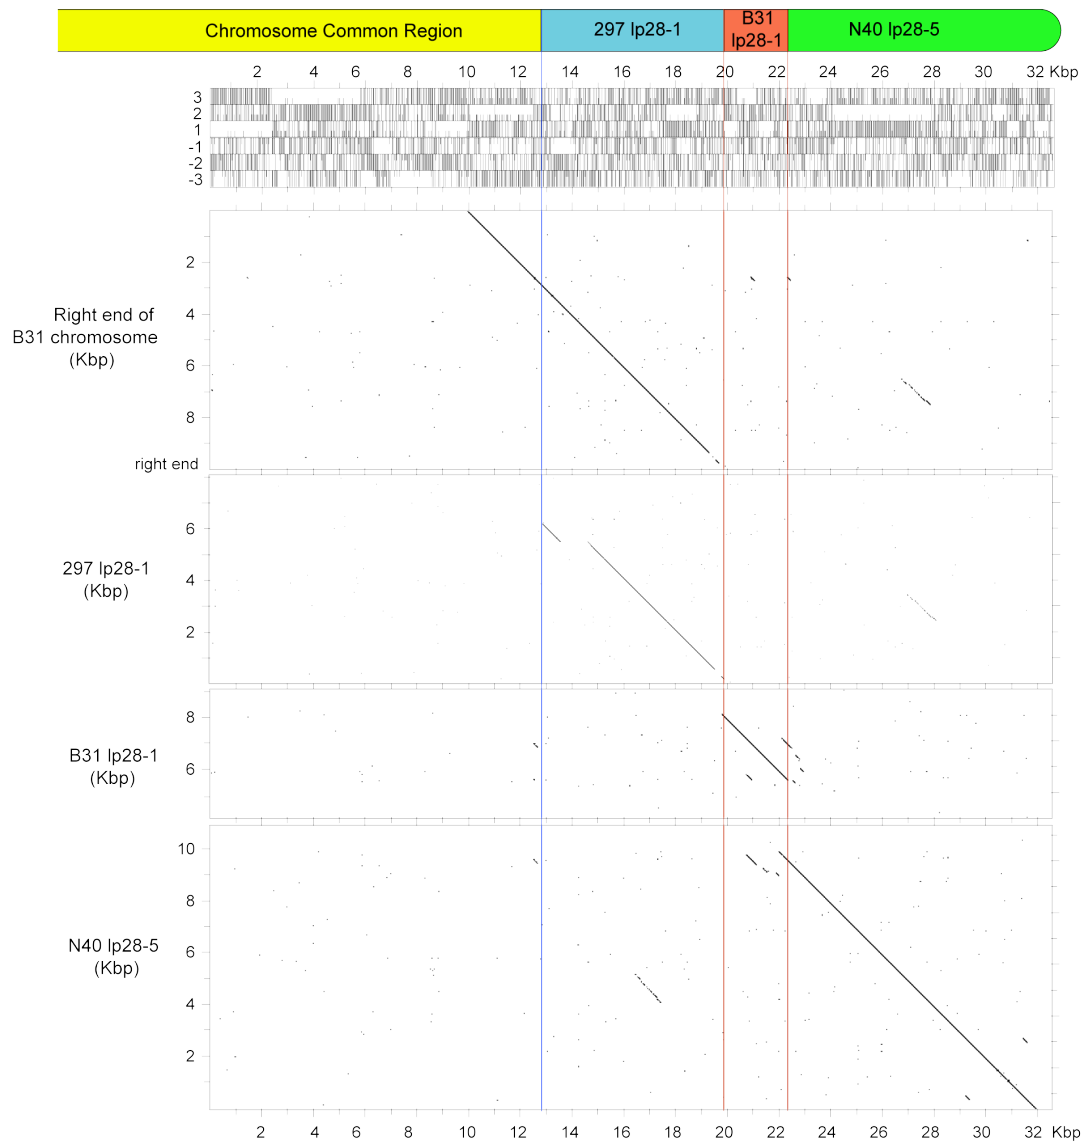

**Figure S1. The *B. burgdorferi* JD1 chromosome right end extension.** Matrix plots comparing the right end of the JD1 chromosome with plasmids in other strains are shown (plots with 19 identities in a 23 bp scanning window were generated by DNA Strider [1]). An open reading frame plot is shown above, where all six reading frames are indicated (1, 2 and 3 are left to right and -1, -2 and -3 are right to left) with stop codon locations marked by vertical lines across the frame, and potential ATG start codons marked by vertical lines half way through the frame.

## Reference

- [1] Douglas SE (1994) DNA Strider. A Macintosh program for handling protein and nucleic acid sequences. *Methods Mol Biol* 25: 181-194.
