# Supplementary material for: Genome Stability of Lyme Disease Spirochetes: Comparative Genomics of Borrelia burgdorferi Plasmids
Source: PLOS journal article supplement (doi:10.1371/journal.pone.0033280), 2012-03-14
Supplement: S3 (10.1371/journal.pone.0033280.s003) [file journal.pone.0033280.s003]

Figure S3. Vls cassette regions

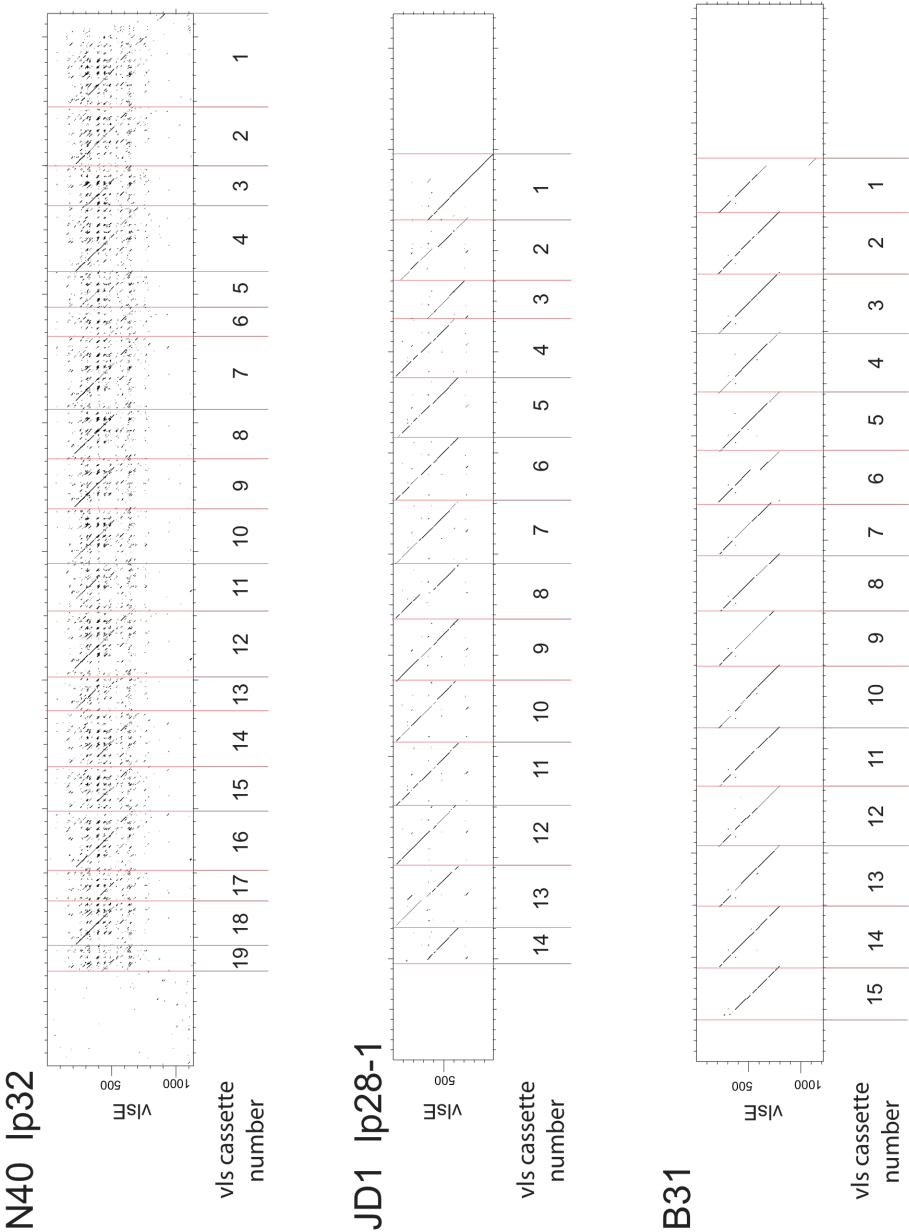

**Figure S3. *B. burgdorferi* vls cassette regions.** The cassette regions for N40, JD1 and B31 are shown, with a matrix plot against the cognate *vlsE* gene region (the putative N40 *vlsE* was kindly supplied by X. Wang and J. Weis).
