# Supplementary material for: Genome Stability of Lyme Disease Spirochetes: Comparative Genomics of Borrelia burgdorferi Plasmids
Source: PLOS journal article supplement (doi:10.1371/journal.pone.0033280), 2012-03-14
Supplement: S4 (10.1371/journal.pone.0033280.s004) [file journal.pone.0033280.s004]

Figure S4. lp28-6 copy number

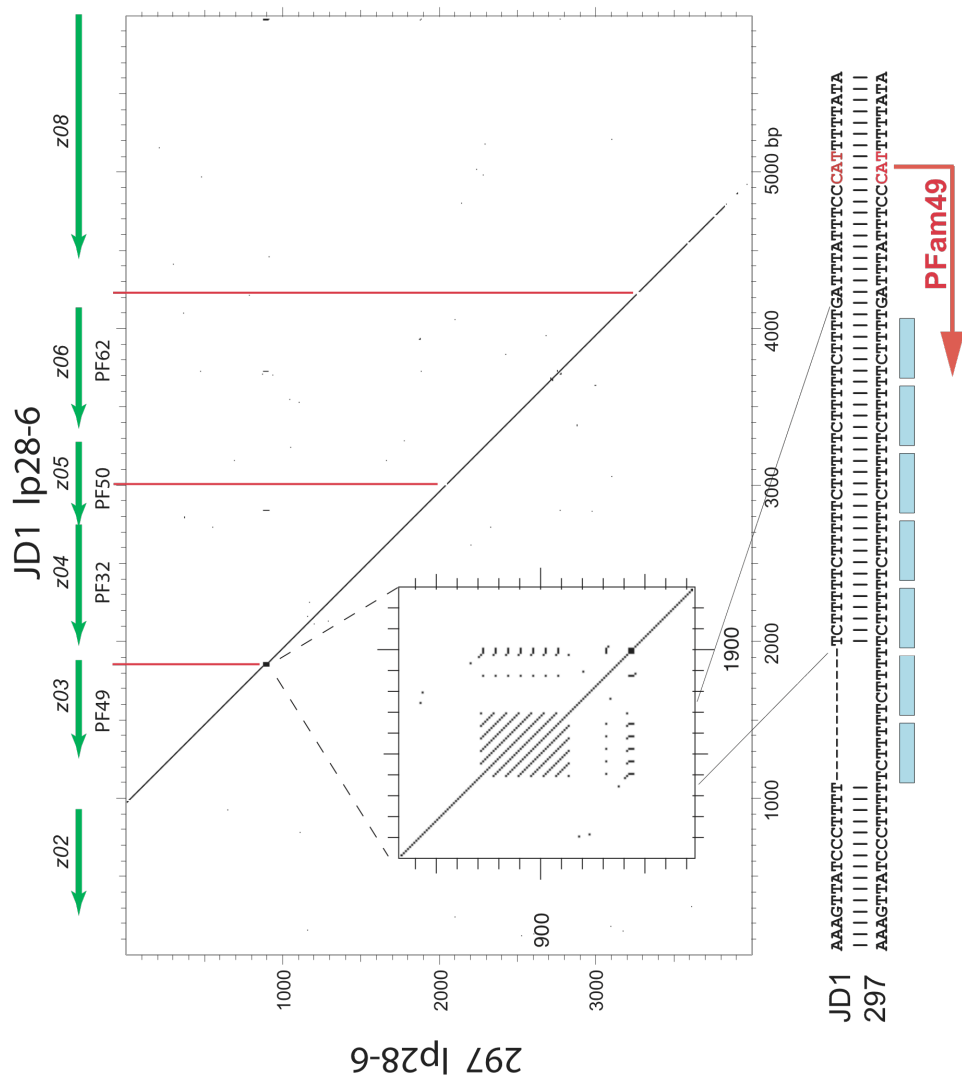

**Figure S4. Comparison of JD1 and 297 lp28-6 partition gene regions.**

A dot matrix plot (generated by DNA Strider [1] with a 15 identities per 15 bp scanning window). There are only three differences between the two plasmids in the partition gene cluster (*jd1\_z03-jd1\_z06* vs. *297\_z01-297\_z04*). The inset shows a magnified view of the difference in *jd1\_z03* (PFam49) and the sequences there are compared below, with the predicted *jd1\_z03* start codon in red and the tandem six bp Lys-Glu encoding repeats indicated by blue rectangles.

**Reference**

1. Douglas SE (1994) DNA Strider. A Macintosh program for handling protein and nucleic acid sequences. *Methods Mol Biol* 25: 181-194.
