# Supplementary material for: Genome Stability of Lyme Disease Spirochetes: Comparative Genomics of Borrelia burgdorferi Plasmids
Source: PLOS journal article supplement (doi:10.1371/journal.pone.0033280), 2012-03-14
Supplement: S8 (10.1371/journal.pone.0033280.s008) [file journal.pone.0033280.s008]

Table S1. B31, JD1, N40 and 297 replicon sizes and accession numbers

|                   | B31                           |                                 |                     |                                         |                   |                  | N40                      |                                    |                     |                                         |                          |                  |
|-------------------|-------------------------------|---------------------------------|---------------------|-----------------------------------------|-------------------|------------------|--------------------------|------------------------------------|---------------------|-----------------------------------------|--------------------------|------------------|
|                   | sequence<br>(bp) <sup>a</sup> | missing<br>terminal bp<br>5' 3' |                     | Measured<br>size<br>(kbp) <sup>b</sup>  | annotated<br>ORFs | accession<br>No. | sequence<br>(bp)         | approximate<br>missing bp<br>5' 3' |                     | Measured<br>size<br>(kbp) <sup>b</sup>  | annotated<br>ORFs        | accession<br>No. |
| chromosome        | 910724                        | 0                               | 0                   | —                                       | 825               | AE000783         | 902191                   | 250                                | 100                 | —                                       | 814                      | CP002228         |
| lp5               | 5228                          | 21 <sup>c</sup>                 | 7 <sup>c</sup>      | 5                                       | 6                 | AE001583         | —                        | —                                  | —                   | —                                       | —                        | —                |
| lp17              | 16928                         | 0                               | 0                   | 17                                      | 19                | AE000793         | 20672                    | 0 <sup>d</sup>                     | 14                  | 21                                      | 19                       | CP002241         |
| lp21              | 18809                         | 0                               | 0                   | 19                                      | 9                 | AE001582         | —                        | —                                  | —                   | —                                       | —                        | —                |
| lp25              | 24407                         | 0                               | 0                   | 25                                      | 11                | AE000785         | 23394                    | 100                                | 700                 | 24                                      | 10                       | CP002234         |
| lp28-1            | 28922                         | 0                               | 0                   | 28                                      | 33                | AE000794         | —                        | —                                  | —                   | —                                       | —                        | —                |
| lp28-2            | 29925                         | 0                               | 0                   | 30                                      | 33                | AE000786         | 29521                    | 200                                | 200                 | 30                                      | 33                       | CP002232         |
| lp28-3            | 28637                         | 0                               | 0                   | 29                                      | 22                | AE000784         | e                        | —                                  | —                   | 29                                      | —                        | —                |
| lp28-4            | 27421                         | 0                               | 0                   | 27                                      | 24                | AE000789         | 29424                    | 200                                | 500                 | 30                                      | 25                       | CP002236         |
| lp28-5            | —                             | —                               | —                   | —                                       | —                 | —                | 26642                    | 700                                | 400                 | 27.5                                    | 26                       | CP002233         |
| lp28-6            | —                             | —                               | —                   | —                                       | —                 | —                | —                        | —                                  | —                   | —                                       | —                        | —                |
| lp28-7            | —                             | —                               | —                   | —                                       | —                 | —                | —                        | —                                  | —                   | —                                       | —                        | —                |
| lp36              | 36926                         | 0                               | 0                   | 36                                      | 36                | AE000788         | 29194                    | 300                                | 2000                | 31.5                                    | 24                       | CP002230         |
| lp38              | 38868                         | 0                               | 0                   | 38                                      | 38                | AE000787         | 37903                    | 500                                | 300                 | 38.5                                    | 30                       | CP002237         |
| lp54              | 53678<br>53029                | 0                               | 0                   | 54                                      | 65                | AE000790         | 53799                    | 6 <sup>a</sup>                     | 6 <sup>a</sup>      | 54                                      | 65                       | CP001651         |
| lp56              | (22622 <sup>b</sup> )         | 0                               | 0                   | 54                                      | 67                | AE001584         | —                        | —                                  | —                   | —                                       | —                        | —                |
| cp9-1             | 9386                          | —                               | —                   | 9.5                                     | 10                | AE000791         | 8722                     | —                                  | —                   | 9                                       | 9                        | CP002232         |
| cp26              | 26498                         | —                               | —                   | 26                                      | 26                | AE000792         | 26498                    | —                                  | —                   | 26                                      | 26                       | CP002239         |
| cp32-1            | 30750                         | —                               | —                   | 31                                      | 42                | AE001575         | —                        | —                                  | —                   | —                                       | —                        | —                |
| cp32-3            | 30223                         | —                               | —                   | 30                                      | 42                | AE001576         | —                        | —                                  | —                   | —                                       | —                        | —                |
| cp32-4            | 30299                         | —                               | —                   | 30                                      | 43                | AE001577         | 15915                    | —                                  | —                   | 16                                      | 19                       | CP002235         |
| cp32-5            | e                             | —                               | —                   | 30                                      | —                 | —                | 29615                    | —                                  | —                   | 30                                      | 41                       | CP002227         |
| cp32-6            | 29838                         | —                               | —                   | 30                                      | 41                | AE001578         | —                        | —                                  | —                   | —                                       | —                        | —                |
| cp32-7            | 30800                         | —                               | —                   | 31                                      | 42                | AE001579         | 17483                    | —                                  | —                   | 17                                      | 25                       | CP002229         |
| cp32-8            | 30885                         | —                               | —                   | 31                                      | 42                | AE001580         | —                        | —                                  | —                   | —                                       | —                        | —                |
| cp32-9            | 30651                         | —                               | —                   | 31                                      | 41                | AE001581         | 30658                    | —                                  | —                   | 31                                      | 42                       | CP002242         |
| cp32-10           | (30349 <sup>b</sup> )         | —                               | —                   | —                                       | —                 | AE001584         | 30154                    | —                                  | —                   | 30                                      | 41                       | CP002240         |
| cp32-11           | —                             | —                               | —                   | —                                       | —                 | —                | —                        | —                                  | —                   | —                                       | —                        | —                |
| cp32-12           | —                             | —                               | —                   | —                                       | —                 | —                | 27767                    | —                                  | —                   | 28                                      | 38                       | CP002238         |
|                   | total<br>sequenced<br>bp      | total 5'<br>missing             | total 3'<br>missing | approx.<br>total<br>length <sup>i</sup> | total ORFs        | —                | total<br>sequenced<br>bp | total 5'<br>missing                | total 3'<br>missing | approx.<br>total<br>length <sup>i</sup> | total<br>plasmid<br>ORFs | —                |
| linear plasmids   | 362778                        | 21                              | 7                   | 362806                                  | 363               | —                | 250549                   | 2006                               | 4120                | 285675                                  | 232                      | —                |
| circular plasmids | 249330                        | —                               | —                   | 279330                                  | 329               | —                | 186812                   | —                                  | —                   | 186812                                  | 241                      | —                |
| all plasmids      | 612108                        | —                               | —                   | 612108                                  | 692               | —                | 437361                   | —                                  | —                   | 472487                                  | 473                      | —                |
| whole genome      | 1522832                       | 21                              | 7                   | 1552860                                 | 1517              | —                | 1339552                  | 2261                               | 4220                | 1375028                                 | 1287                     | —                |

|                   | JD1                      |                                    |                     |                                         |                          |                  | 297                      |                                    |                     |                                         |                          |                  |
|-------------------|--------------------------|------------------------------------|---------------------|-----------------------------------------|--------------------------|------------------|--------------------------|------------------------------------|---------------------|-----------------------------------------|--------------------------|------------------|
|                   | sequence<br>(bp)         | approximate<br>missing bp<br>5' 3' |                     | Measured<br>size<br>(kbp) <sup>b</sup>  | annotated<br>ORFs        | accession<br>No. | sequence<br>(bp)         | approximate<br>missing bp<br>5' 3' |                     | Measured<br>size<br>(kbp) <sup>b</sup>  | annotated<br>ORFs        | accession<br>No. |
| chromosome        | 922801                   | 30                                 | 600                 | —                                       | 829                      | CP002312         | nd <sup>f</sup>          | —                                  | —                   | 921000 <sup>h</sup>                     | —                        | —                |
| lp5               | —                        | —                                  | —                   | —                                       | —                        | —                | —                        | —                                  | —                   | —                                       | —                        | —                |
| lp17              | 17522                    | 150                                | 700                 | 19                                      | 15                       | CP002313         | 12965                    | 2900                               | 3000                | 19                                      | 11                       | CP002264         |
| lp21              | —                        | —                                  | —                   | —                                       | —                        | —                | —                        | —                                  | —                   | —                                       | —                        | —                |
| lp25              | 22827                    | 1000                               | 500                 | 24.5                                    | 15                       | CP002308         | e                        | —                                  | —                   | 24                                      | —                        | —                |
| lp28-1            | 24534                    | nd                                 | nd                  | nd                                      | 13                       | CP002306         | 20978                    | 500                                | 4000                | 26                                      | 11                       | CP002265         |
| lp28-2            | —                        | —                                  | —                   | —                                       | —                        | —                | —                        | —                                  | —                   | —                                       | —                        | —                |
| lp28-3            | 28797                    | 0 <sup>d</sup>                     | 0 <sup>d</sup>      | 29                                      | 22                       | CP002314         | 25211                    | 2200                               | 1800                | 29.5                                    | 17                       | CP002253         |
| lp28-4            | 30096                    | 2200                               | 200                 | 31.5                                    | 26                       | CP002318         | 25788                    | 2100                               | 2600                | 30                                      | 21                       | CP002266         |
| lp28-5            | 24610                    | 2000                               | 1000                | 29                                      | 28                       | CP002317         | 20974                    | 5000                               | 2700                | 28                                      | 25                       | CP002267         |
| lp28-6            | 26991                    | 0 <sup>d</sup>                     | 300                 | 28                                      | 30                       | CP002324         | 22135                    | 2200                               | 2600                | 27                                      | 24                       | CP002259         |
| lp28-7            | 29993                    | 1000                               | 300                 | 30.5                                    | 33                       | CP002319         | —                        | —                                  | —                   | —                                       | —                        | —                |
| lp36              | 22808                    | 900                                | 400                 | 24                                      | 21                       | CP002315         | 22715                    | 1300                               | 100                 | 24                                      | 21                       | CP002256         |
| lp38              | 27590                    | 100                                | 1300                | 29                                      | 23                       | CP002325         | 27035                    | 2000                               | 2500                | 31                                      | 28                       | CP002258         |
| lp54              | 52926                    | 17 <sup>a</sup>                    | 9 <sup>a</sup>      | 54                                      | 64                       | CP001652         | 48220                    | 3000                               | 4000                | 54                                      | 60                       | CP001653         |
| lp56              | —                        | —                                  | —                   | —                                       | —                        | —                | —                        | —                                  | —                   | —                                       | —                        | —                |
| cp9-1             | —                        | —                                  | —                   | —                                       | —                        | —                | —                        | —                                  | —                   | —                                       | —                        | —                |
| cp26              | 26525                    | —                                  | —                   | 26                                      | 26                       | CP002316         | 26498                    | —                                  | —                   | 26                                      | 26                       | CP002268         |
| cp32-1            | 60739                    | —                                  | —                   | 62                                      | 85                       | CP002310         | 30920                    | —                                  | —                   | 31                                      | 42                       | CP002254         |
| cp32-3            | 29707                    | —                                  | —                   | 30                                      | 41                       | CP002320         | 30262                    | —                                  | —                   | 31                                      | 42                       | CP002269         |
| cp32-4            | —                        | —                                  | —                   | —                                       | —                        | —                | 30301                    | —                                  | —                   | 30                                      | 42                       | CP002270         |
| cp32-5            | (fused to<br>cp32-1)     | —                                  | —                   | —                                       | —                        | —                | 30636                    | —                                  | —                   | 31                                      | 42                       | CP002261         |
| cp32-6            | 30804                    | —                                  | —                   | 31                                      | 42                       | CP002307         | 30641                    | —                                  | —                   | 31                                      | 42                       | CP002263         |
| cp32-7            | —                        | —                                  | —                   | —                                       | —                        | —                | 21165                    | —                                  | —                   | 21                                      | 29                       | CP002257         |
| cp32-8            | 31085                    | —                                  | —                   | 31                                      | 42                       | CP002311         | —                        | —                                  | —                   | —                                       | —                        | —                |
| cp32-9            | 30697                    | —                                  | —                   | 31                                      | 43                       | CP002322         | 21172                    | —                                  | —                   | 21                                      | 29                       | CP002262         |
| cp32-10           | 30314                    | —                                  | —                   | 30                                      | 42                       | CP002323         | —                        | —                                  | —                   | —                                       | —                        | —                |
| cp32-11           | 29902                    | —                                  | —                   | 30                                      | 41                       | CP002309         | 30286                    | —                                  | —                   | 30                                      | 42                       | CP002260         |
| cp32-12           | 30019                    | —                                  | —                   | 30                                      | 41                       | CP002321         | 30795                    | —                                  | —                   | 31                                      | 42                       | CP002255         |
|                   | total<br>sequenced<br>bp | total 5'<br>missing                | total 3'<br>missing | approx.<br>total<br>length <sup>i</sup> | total<br>plasmid<br>ORFs | —                | total<br>sequenced<br>bp | total 5'<br>missing                | total 3'<br>missing | approx.<br>total<br>length <sup>i</sup> | total<br>plasmid<br>ORFs | —                |
| linear plasmids   | 308694                   | 7368                               | 4709                | 320771                                  | 290                      | —                | 226021                   | 21200                              | 23300               | 294521                                  | 218                      | —                |
| circular plasmids | 299792                   | —                                  | —                   | 299792                                  | 403                      | —                | 282676                   | —                                  | —                   | 282676                                  | 378                      | —                |
| all plasmids      | 608486                   | —                                  | —                   | 620563                                  | 693                      | —                | 508697                   | —                                  | —                   | 577197                                  | 596                      | —                |
| whole genome      | 1531287                  | 7398                               | 5309                | 1543994                                 | 1522                     | —                | 508697                   | —                                  | —                   | 1498197                                 | 1416 <sup>h</sup>        | —                |

### **Table S1 footnotes**

- a. Values include terminal bp determined by Fraser *et al.* [1], Zhang *et al.* [2], Huang *et al.* [3], and Tourand *et al.* [4]. We (J. Aron, S. Casjens and W. M. Huang, unpublished) independently determined the sequence to the tips of the B31 lp54 plasmid. Since the lp54s are all extremely similar, these values assume the tips are all the same. B31 lp28-1 length was assembled from several published sequences as described in text.
- b. All plasmid sizes were measured by Southern analysis, and the values obtained agree with the size of the sequence plus the missing sequence to within experimental error.
- c. The lp5 ends are virtually identical to those of lp21. If this relationship continues to the ends, there are 21 and 7 bp that were not determined experimentally at the left and right end of lp5, respectively.
- d. Bulk sequence went to the end of the telomere of plasmid; this be discussed in detail in a subsequent publication (S. Casjens, D. Radune and W. M. Huang, unpublished).
- e. Present in some cultures of this strain but lost from sequenced culture (see text).
- f. nd, not determined
- g. cp32-10 is integrated into the lp56 plasmid in strain B31 [5].
- h. Assumes same chromosome constant region as is present in other strains and includes right end analysis of Huang *et al.* [3].
- i. Includes approximate lengths of plasmids known to be present in the strain but which were not sequenced (see footnote e).

### **References**

1. Fraser CM, Casjens S, Huang WM, Sutton GG, Clayton R, *et al.* (1997) Genomic sequence of a Lyme disease spirochaete, *Borrelia burgdorferi*. *Nature* 390: 580-586.
2. Zhang JR, Hardham JM, Barbour AG, Norris SJ (1997) Antigenic variation in Lyme disease *borreliae* by promiscuous recombination of VMP-like sequence cassettes. *Cell* 89: 275-285.
3. Huang WM, Robertson M, Aron J, Casjens S (2004) Telomere exchange between linear replicons of *Borrelia burgdorferi*. *J Bacteriol* 186: 4134-4141.
4. Tourand Y, Deneke J, Moriarty TJ, Chaconas G (2009) Characterization and in vitro reaction properties of 19 unique hairpin telomeres from the linear plasmids of the Lyme disease spirochete. *J Biol Chem* 284: 7264-7272.
5. Casjens S, Palmer N, van Vugt R, Huang WM, Stevenson B, *et al.* (2000) A bacterial genome in flux: the twelve linear and nine circular extrachromosomal DNAs in an infectious isolate of the Lyme disease spirochete *Borrelia burgdorferi*. *Mol Microbiol* 35: 490-516.
