# Supplementary material for: Genome Stability of Lyme Disease Spirochetes: Comparative Genomics of Borrelia burgdorferi Plasmids
Source: PLoS One. 2012 Mar 14;7(3):e33280. doi: 10.1371/journal.pone.0033280 (PMC3303823; doi:10.1371/journal.pone.0033280)
Supplement: Table S4 — Lyme agent Borrelia plasmid letter appellations for locus tags. (PDF) [file pone.0033280.s011.pdf]

**Table S4**  
**Lyme agent *Borrelia* plasmid letter**  
**appellations for locus tags**

| <u>Plasmid Name<sup>a</sup></u>                                                             | <u>Letter designation<sup>a</sup></u> | <u>Example locus tag<sup>a</sup></u> |
|---------------------------------------------------------------------------------------------|---------------------------------------|--------------------------------------|
| Chromosome                                                                                  | no letter                             | BbuN40_0001                          |
| lp54                                                                                        | A                                     | BbuN40_A01                           |
| cp26                                                                                        | B                                     | BbuN40_B01                           |
| cp9-1                                                                                       | C                                     | BbuN40_C01                           |
| lp17                                                                                        | D                                     | BbuN40_D01                           |
| lp25                                                                                        | E                                     | BbuN40_E01                           |
| lp28-1 <sup>b</sup>                                                                         | F <sup>b</sup>                        | BbuN40_F01                           |
| lp28-2                                                                                      | G                                     | BbuN40_G01                           |
| lp28-3                                                                                      | H                                     | BbuN40_H01                           |
| lp28-4                                                                                      | I                                     | BbuN40_I01                           |
| lp36                                                                                        | K                                     | BbuN40_K01                           |
| lp38                                                                                        | J                                     | BbuN40_J01                           |
| cp32-1                                                                                      | P                                     | BbuN40_P01                           |
| cp32-3                                                                                      | S                                     | BbuN40_S01                           |
| cp32-4                                                                                      | R                                     | BbuN40_R01                           |
| cp32-6                                                                                      | M                                     | BbuN40_M01                           |
| cp32-7 (& -2 <sup>c</sup> )                                                                 | O                                     | BbuN40_O01                           |
| cp32-8                                                                                      | L                                     | BbuN40_L01                           |
| cp32-9                                                                                      | N                                     | BbuN40_N01                           |
| cp32-10 <sup>d,e</sup>                                                                      | Q <sup>d,e</sup>                      | BbuN40_J01                           |
| lp5                                                                                         | T                                     | BbuN40_T01                           |
| lp21                                                                                        | U                                     | BbuN40_U01                           |
| <u>Plasmids not present in the strain B31 genome sequence</u>                               |                                       |                                      |
| cp32-5                                                                                      | V                                     | BbuN40_V01                           |
| cp32-11                                                                                     | W                                     | BbuN40_W01                           |
| cp32-12                                                                                     | X                                     | BbuN40_X01                           |
| lp28-5                                                                                      | Y                                     | BbuN40_Y01                           |
| lp28-6                                                                                      | Z                                     | BbuN40_Z01                           |
| lp28-7                                                                                      | AA                                    | BbuJD1_AA01                          |
| lp28-8 <sup>e</sup>                                                                         | AC <sup>e</sup>                       | Bbu94a_AC01                          |
| lp28-9 <sup>e</sup>                                                                         | AG <sup>e</sup>                       | BbuBol26_AG01                        |
| lp56 <sup>d</sup>                                                                           | AD <sup>d</sup>                       | Bbu94a_AD01                          |
| cp32-13 <sup>e</sup>                                                                        | AF <sup>e</sup>                       | Bbu72a_AB01                          |
| lp32-3, -6, 10 & -12 <sup>f</sup>                                                           |                                       | see footnote f                       |
| <u>Plasmids that carry apparently intact partition gene clusters of two different types</u> |                                       |                                      |
| cp32-1+5 <sup>a</sup>                                                                       | PV                                    | BbuJD1_PV01                          |
| cp32-3+8 <sup>a</sup>                                                                       | SL                                    | Bbu64a_SL01                          |
| cp32-3+10 <sup>a</sup>                                                                      | SQ                                    | BbuZS7_SQ01                          |
| cp32-7+9 <sup>a</sup>                                                                       | ON                                    | Bbu118a_ON01                         |
| cp32-quad                                                                                   | NXAF                                  | BbiDN127_NXAF01                      |
| <u>Apparent plasmid fragments that carry no PFam32 genes</u>                                |                                       |                                      |
| Unknown                                                                                     | ZZ                                    | BbuJD1_ZZ01                          |

**Table S4 Footnotes:**

- a. Plasmid names (and thus locus\_tag letter designation) were determined by the apparent “compatibility type” of the PFam32 plasmid partitioning gene on the plasmid as determined by sequence comparison (see text).  
If there are two PFam32 genes on a plasmid (rare, but it occurs):
  - i. Use the one that is in the more “intact” replication/partition type gene cluster (see “b” below).
  - ii. In cases where both are in an apparently intact cluster, *e.g.*, the fused cp32-1/cp32-5 plasmid cp32-1+5 in strain JD1, both letters are used to give the locus tag “BbuJD1\_PV01”.
  - iii. We have identified three other fused cp32s in *B. burgdorferi* strains 64a, ZS7 and 118a [1] and nomenclature for these is shown in the table.
- b. There are two PFam32 genes on B31 lp28-1
  - i. B31 lp28-1 has two PFam32 genes, *f13* and *f24*. The *f13* is in an incomplete (apparently partly deleted) cluster and *f24* is in the complete cluster.
  - ii. To date, *f13* on B31 lp28-1 has not been found on other *Borrelia* plasmids.
  - iii. Therefore we gave “F” locus\_tags to plasmids with an *f24* type PFam32 gene and recommend giving a new letter code to plasmids driven by a *f13* type PFam32 gene when and if the latter are found.
- c. Plasmids cp32-2 and cp32-7 were given separate names before it was realized that they belong to the same compatibility group. We suggest that the name “cp32-2” no longer be used and “cp32-7” be used for plasmids found to have this type of PFam32 gene, since the B31 cp32-7 plasmid is completely sequenced and is thus better characterized.
- d. We apply “Q” to circular cp32-10 type plasmids and “AD” to lp56 type plasmids that do not carry an integrated cp32-10. Such lp56 plasmids are present in *B. burgdorferi* strains 94a, WI91-23 and CA-11.2A [1].
  - i. B31 lp56 genes were given locus\_tags with the letter “Q”.
  - ii. The linear plasmid lp56 has a cp32-10 integrated into the PFam62/57 gene of its native partition gene cluster.
  - iii. Thus, B31 lp56 has two different intact PFam32 genes (*q08* in its broken cluster and *q40* in the intact cluster of the integrated cp32-10); these belong to two different “compatibility types” of PFam32 genes. We therefore suspect that B31 lp56 partition is driven by the apparently intact cluster in the cp32-10 that includes PFam32 gene *q40*.
  - iv. Hence, we give plasmids with B31 lp56 *q40* type PFam32 genes the locus\_tag letter Q and plasmids with only the *q08* type PFam32 gene the letters “AD”.
- e. Plasmids with only cp32-13, lp28-8 and lp28-9 PFam32 genes are not present in the four strains studied in this report, but cp32-13 is known in strain CA-15 [2] as well as strains CA-11.2A, 118a and 72a [1] and lp28-8 and lp28-9 are known from the sequences of the genomes of *B. burgdorferi* strains 94a and Bol26, respectively [1].
- f. Plasmids we name “lp32-3” are found in *B. burgdorferi* strains 72a and 118a [1]. Plasmids “lp32-6”, “lp32-10” and “lp32-12” are known in isolates SV1, PKo (and ACA-1 and Far04) and SV1, respectively (our unpublished results). These are all apparently linear plasmids that have significantly different genetic contents from the cp32s, but they carry a cp32-3, -6, -10 or -12 type PFam32 gene, respectively (no lp32 has been found in the same cell as a cp32 with the same putative PFam32 compatibility). We propose to name the locus tags for genes on these plasmids with the letters S, M, Q and X, which correspond to cp32-3, -6, -10 and -12, respectively.

**References**

1. Schutzer SE, Fraser-Liggett CM, Casjens SR, Qiu WG, Dunn JJ, *et al.* (2011) Whole genome sequences of thirteen isolates of *Borrelia burgdorferi*. J Bacteriol 193: 1018-1020.
2. Stevenson B, Miller JC (2003) Intra- and interbacterial genetic exchange of Lyme disease spirochete *erp* genes generates sequence identity amidst diversity. J Mol Evol 57: 309-324.
